# Supplementary material for: Unsymmetric Ir(iii) phosphorescent complexes with both 2-phenylpyridine(ppy)- and 2-vinylpyridine(vpy)-type ligands bearing functional groups and their optoelectronic properties
Source: Royal Society of Chemistry journal article supplement (doi:10.1039/d3tc02552g), 2023-01-01
Supplement: d3tc02552g1.pdf [file d3tc02552g1.pdf]

## Electronic Supplementary Information

### **Unsymmetric Ir(III) phosphorescent complexes with both 2-phenylpyridine(ppy)- and 2-vinylpyridine(vpy)-type ligands bearing functional groups and their optoelectronic properties**

Siqi Liu,<sup>a</sup> Zhao Feng,<sup>a</sup> Hongyan Wang,<sup>a</sup> Huaiteng Hang,<sup>a</sup> Daokun Zhong,<sup>a</sup> Xiaolong Yang,<sup>a</sup> Yuanhui Sun,<sup>a</sup> Bochao Su,<sup>a</sup> Xianbin Xu,<sup>b</sup> Zhen Feng,<sup>b</sup> Guijiang Zhou,<sup>a\*</sup> and Bo Jiao<sup>c</sup>

<sup>a</sup> *Engineering Research Center of Energy Storage Materials and Devices, Ministry of Education, School of Chemistry, State Key Laboratory for Mechanical Behavior of Materials, Xi'an Jiaotong University, Xi'an 710049, P. R. China.*

<sup>b</sup> *Shaanxi Light Optoelectronics Material Co., Ltd. Building 3, No. 99, Longfeng Road, High-tech Zone, Xi'an, Shaanxi 710065, P. R. China*

<sup>c</sup> *Key Laboratory for Physical Electronics and Devices of the Ministry of Education, Faculty of Electronic and Information Engineering, Xi'an Jiaotong University, Xi'an 710049, P. R. China.*

Corresponding author E-mail address: zhougj@mail.xjtu.edu.cn (G. J. Zhou)

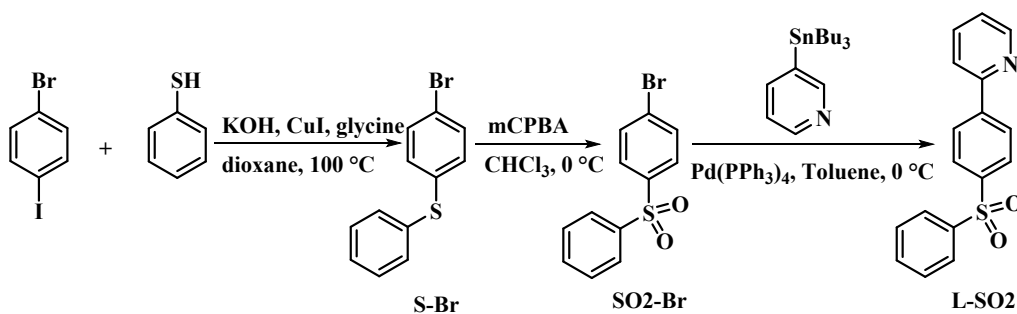

**Scheme S1** Synthesis of the Key Intermediate Compounds L-SO2.

**Synthesis of S-Br.** Under nitrogen atmosphere, thiophenol (1.0 equiv), 1-Bromo-4-iodobenzene (1.0 equiv), KOH (2.5 equiv), CuI (0.05 equiv), glycine (0.2 equiv) and 1,4-dioxane (50 mL) were added and the reaction mixture was allowed to proceed at 100 °C for 16 h. After cooling to room temperature, the filter residue was filtered off and the filtrate was concentrated. The product was isolated with preparative thin-layer chromatography (TLC) on silica gel with petroleum ether as eluent.

**Synthesis of SO2-Br.** The reactant **S-Br** (1.0 equiv) was dissolved into  $\text{CHCl}_3$  and then *m*-chloroperoxybenzoic acid (4.5 equiv) was slowly added under the condition of ice water bath. The mixture was stirred at room temperature for 72 h. The filtrate was concentrated after removing the filter residue and the crude product was purified by column chromatographed on silica gel using  $\text{CH}_2\text{Cl}_2$  and petroleum ether (1:1, v/v) as eluent.

**Synthesis of L-SO2.** Under a  $\text{N}_2$  atmosphere, **SO2-Br** (1.0 equiv), tributylpyridyltin (1.1 equiv) and catalyst  $\text{Pd}(\text{PPh}_3)_4$  (0.05 equiv) were added and the mixture was heated to 110 °C for 16 h. After the reaction system was cooled to RT, the reaction mixture was concentrated and the crude product was separated and purified by silica gel column chromatography using  $\text{CH}_2\text{Cl}_2$  and petroleum ether (2:1, v/v) as eluent.

**L-SO2:** yield 75 %.  $^1\text{H}$  NMR (400 MHz,  $\text{CDCl}_3$ ):  $\delta$  (ppm) 8.71 (d,  $J = 4.8$  Hz, 1 H), 8.13 (d,  $J = 8.4$  Hz, 2 H), 8.04 (d,  $J = 8.8$  Hz, 2 H), 7.97 (d,  $J = 7.2$  Hz, 2 H), 7.81 – 7.74 (m, 2 H), 7.59 – 7.49 (m,

3 H), 7.32 – 7.29 (m, 1 H);  $^{13}\text{C}$  NMR (100 MHz,  $\text{CDCl}_3$ ):  $\delta$  (ppm) 155.28, 149.99, 143.97, 141.55, 141.49, 137.02, 133.21, 129.28, 128.14, 127.71, 127.61, 123.26, 121.05.

**General Procedure for Synthesis of L-1, L-2 and L-3.** 2-Vinylpyridine (1.1 equiv), halogenated compounds (1.0 equiv) and catalyst  $(\text{PPh}_3)_2\text{PdCl}_2$  (0.1 equiv) were added into triethylamine (20 mL) to obtain reaction mixture which was stirred for 16-19 h at 100 °C. After cooling to room temperature, the solvent was removed and the crude product was purified on silica gel using the mixed solution of petroleum ether,  $\text{CH}_2\text{Cl}_2$  and diethylene glycol monoether as eluent.

**L-1:** yield 65 %.  $^1\text{H}$  NMR (400 MHz,  $\text{CDCl}_3$ ):  $\delta$  (ppm) 8.61 (d,  $J = 4.4$  Hz, 1 H), 7.68 – 7.62 (m, 2 H), 7.59 (d,  $J = 7.6$  Hz, 2 H), 7.40 – 7.38 (m, 3 H), 7.30 (t,  $J = 7.6$  Hz, 1 H), 7.20 – 7.12 (m, 2 H);  $^{13}\text{C}$  NMR (100 MHz,  $\text{CDCl}_3$ ):  $\delta$  (ppm) 155.53, 149.62, 136.57, 136.50, 132.63, 128.67, 128.28, 127.87, 127.05, 122.07, 122.02.

**L-2:** yield 44%.  $^1\text{H}$  NMR (400 MHz,  $\text{CDCl}_3$ ):  $\delta$  (ppm) 8.59 (d,  $J = 4.0$  Hz, 1 H), 7.63 (td,  $J = 2.0$ , 7.6 Hz, 1 H), 7.58 (d,  $J = 16.4$  Hz, 1 H), 7.45 (d,  $J = 8.8$  Hz, 2 H), 7.35 (d,  $J = 7.6$  Hz, 1 H), 7.27 (t,  $J = 8.0$  Hz, 4 H), 7.14 – 7.03 (m, 10 H);  $^{13}\text{C}$  NMR (100 MHz,  $\text{CDCl}_3$ ):  $\delta$  (ppm) 155.89, 149.58, 147.97, 147.34, 136.43, 132.14, 130.42, 129.29, 127.97, 125.99, 124.72, 123.23, 122.96, 121.78, 121.63.

**L-3:** yield 65 %.  $^1\text{H}$  NMR (400 MHz,  $\text{CDCl}_3$ ):  $\delta$  (ppm) 8.60 (d,  $J = 4.4$  Hz, 1 H), 7.67 – 7.59 (m, 2 H), 7.56 – 7.54 (m, 2 H), 7.38 – 7.34 (m, 3 H), 7.15 – 7.01 (m, 7 H);  $^{13}\text{C}$  NMR (100 MHz,  $\text{CDCl}_3$ ):  $\delta$  (ppm) 157.58, 156.72, 155.63, 149.61, 136.50, 131.86, 131.66, 129.78, 128.49, 126.87, 123.55, 121.95, 121.88, 119.19, 118.72.

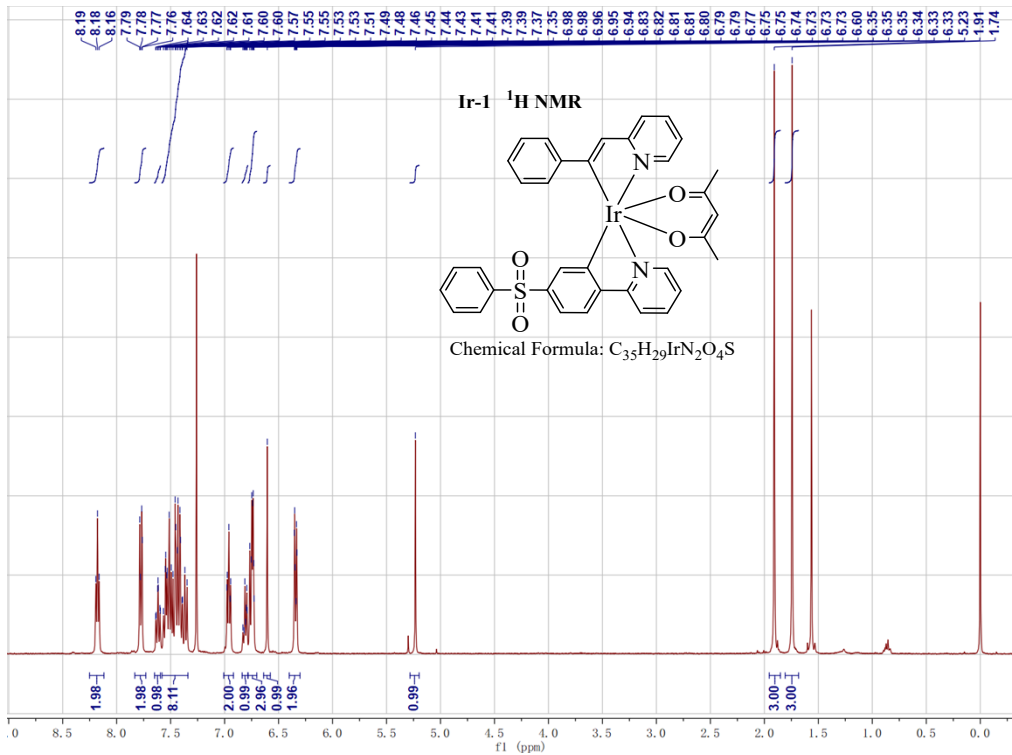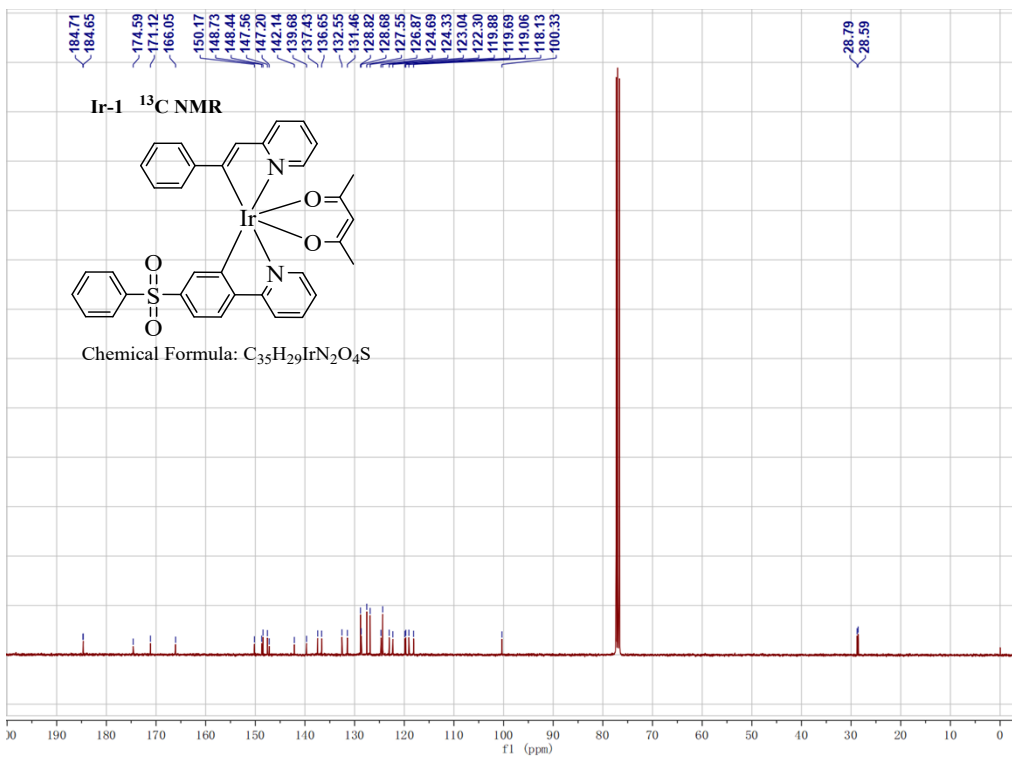



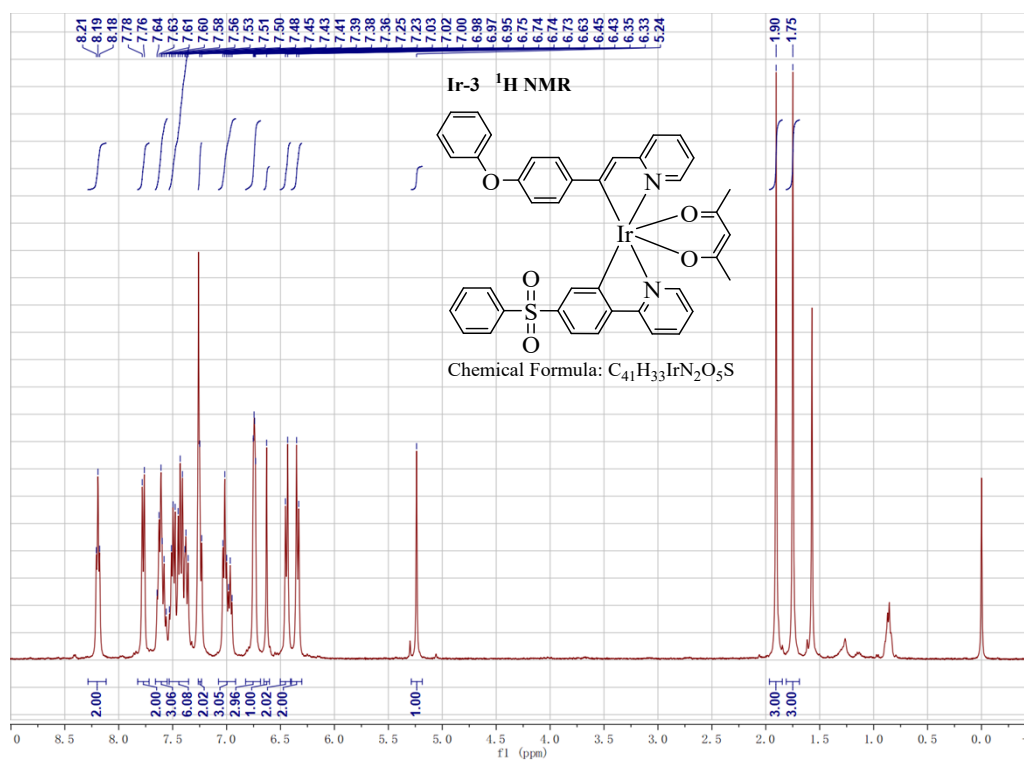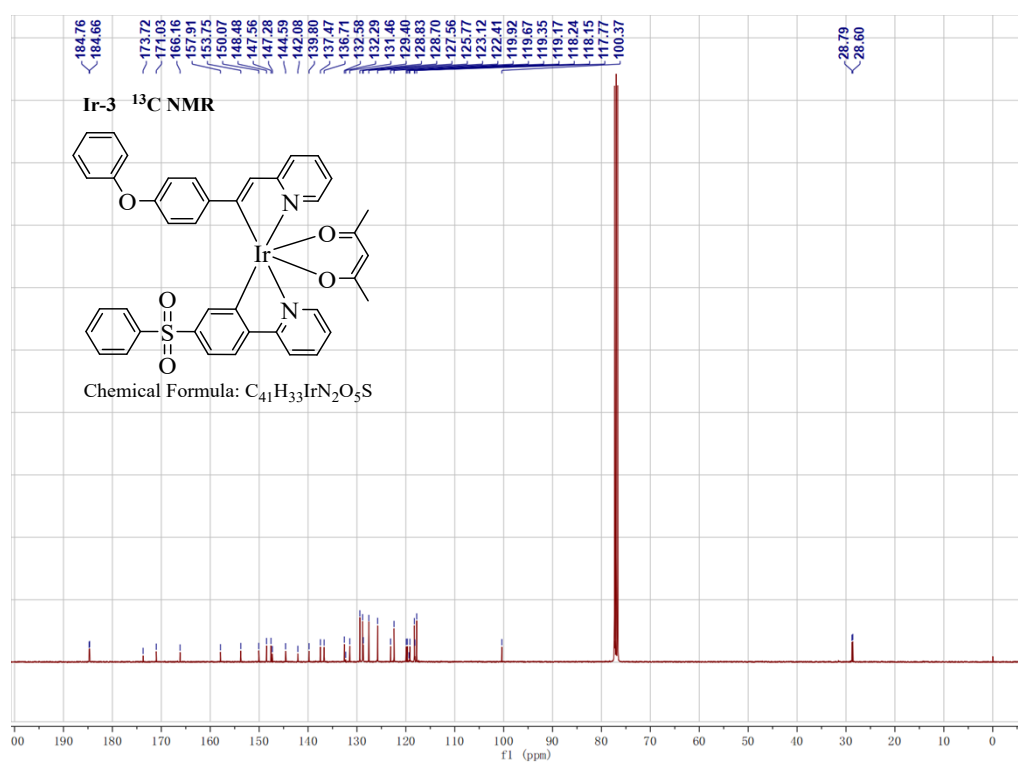

**Fig. S1** NMR spectra of these unsymmetric  $\text{Ir}^{\text{III}}(\text{ppy-vpy})\text{acac}$ -type complexes.

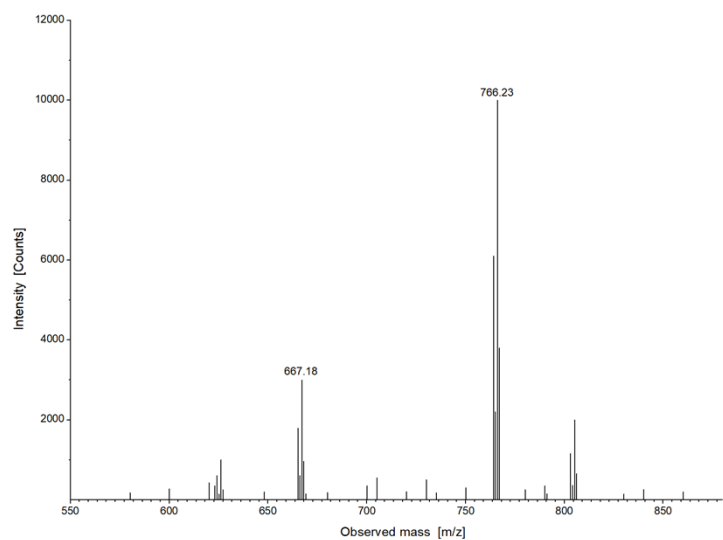

(a) Ir-1

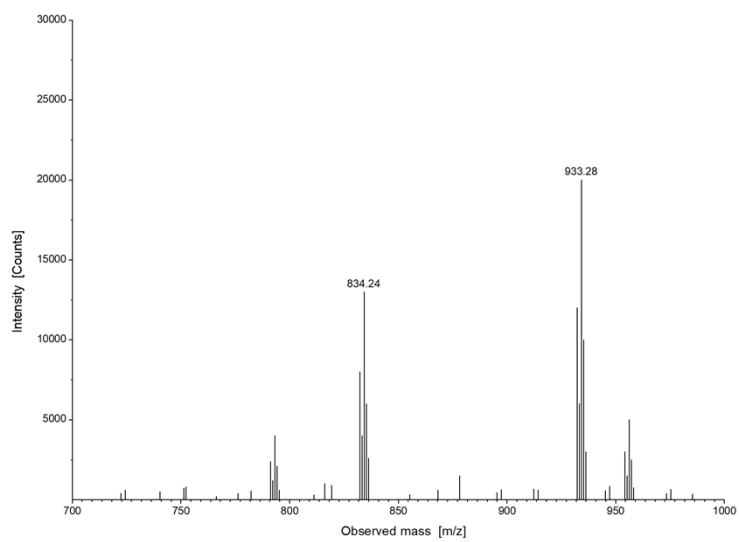

(b) Ir-2

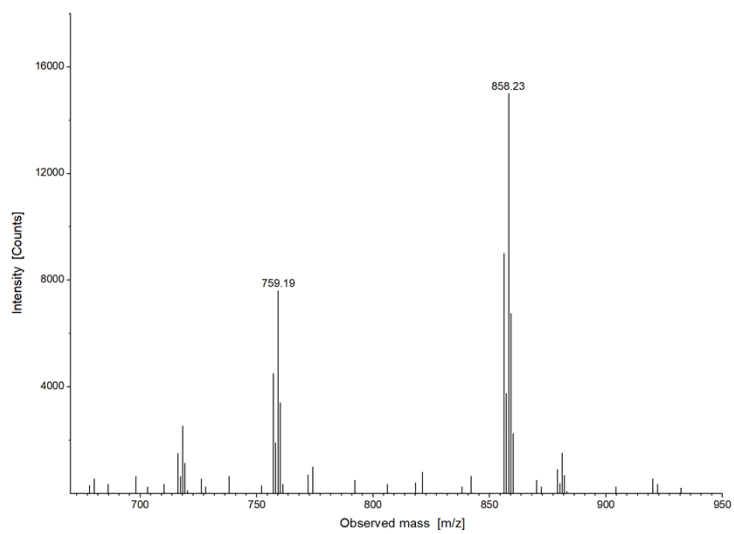

(c) Ir-3

**Fig. S2** Mass spectra of these unsymmetric Ir<sup>III</sup>(ppy-vpy)acac-type complexes.

**Table S1** Crystal and data parameters for **Ir-1**.

| compound                                                                     | <b>Ir-1</b>                                                       |
|------------------------------------------------------------------------------|-------------------------------------------------------------------|
| CCDC No.                                                                     | 2289776                                                           |
| Formula                                                                      | C <sub>35</sub> H <sub>29</sub> IrN <sub>2</sub> O <sub>4</sub> S |
| Formula weight                                                               | 765.86                                                            |
| Crystal system                                                               | Triclinic                                                         |
| Space group                                                                  | <i>P</i> $\bar{1}$                                                |
| <i>a</i> (Å)                                                                 | 10.118(3)                                                         |
| <i>b</i> (Å)                                                                 | 11.146(3)                                                         |
| <i>c</i> (Å)                                                                 | 15.176(5)                                                         |
| $\alpha$ (deg)                                                               | 104.493(10)                                                       |
| $\beta$ (deg)                                                                | 93.639(10)                                                        |
| $\gamma$ (deg)                                                               | 112.115(10)                                                       |
| <i>V</i> (Å <sup>3</sup> )                                                   | 1511.3(8)                                                         |
| <i>Z</i>                                                                     | 2                                                                 |
| D <sub>calcd</sub> (g cm <sup>-3</sup> )                                     | 1.683                                                             |
| Crystal size (mm <sup>3</sup> )                                              | 0.160×0.170×0.110                                                 |
| <i>F</i> (000)                                                               | 756                                                               |
| $\mu$ (mm <sup>-1</sup> )                                                    | 4.529                                                             |
| 2 $\theta$ range (deg)                                                       | 4.13 - 54.986                                                     |
| Reflections collected                                                        | 31672                                                             |
| Independent reflections                                                      | 6908                                                              |
| Parameters                                                                   | 390                                                               |
| <i>R</i> 1, <i>wR</i> 2 [ <i>I</i> > 2.0 $\sigma$ ( <i>I</i> )] <sup>a</sup> | 0.0198, 0.0437                                                    |
| <i>R</i> 1, <i>wR</i> 2 (all data)                                           | 0.0213, 0.0443                                                    |
| GOF on <i>F</i> <sup>2</sup> <sup>b</sup>                                    | 1.067                                                             |

<sup>a</sup>  $R1 = \sum ||F_0| - |F_c|| / \sum |F_0|$ .  $wR2 = \{ \sum [w(F_0^2 - F_c^2)^2] / \sum [w(F_0^2)^2] \}^{361/2}$ .

<sup>b</sup>  $GOF = [(\sum w|F_0| - |F_c|)^2 / (N_{obs} - N_{param})]^{1/2}$ .



**Table S2** Selected structural parameters of **Ir-1**.

| Bond angles (°)  |            |                   |            | Bond lengths (Å) |            |
|------------------|------------|-------------------|------------|------------------|------------|
| O(1)-Ir(1)-O(2)  | 88.24(7)   | C(16)-Ir(1)-C(29) | 86.05(9)   | Ir(1)-O(1)       | 2.1394(17) |
| N(1)-Ir(1)-O(1)  | 96.16(7)   | C(29)-Ir(1)-O(1)  | 95.66(8)   | Ir(1)-O(2)       | 2.1550(17) |
| N(1)-Ir(1)-O(2)  | 89.00(7)   | C(29)-Ir(1)-O(2)  | 174.18(8)  | Ir(1)-N(1)       | 2.0440(19) |
| N(2)-Ir(1)-O(1)  | 88.07(7)   | C(29)-Ir(1)-N(1)  | 94.86(9)   | Ir(1)-N(2)       | 2.034(2)   |
| N(2)-Ir(1)-O(2)  | 96.22(7)   | C(29)-Ir(1)-N(2)  | 79.64(9)   | Ir(1)-C(16)      | 1.981(2)   |
| N(2)-Ir(1)-N(1)  | 173.39(8)  | O(3)-S(1)-C(14)   | 108.32(12) | Ir(1)-C(29)      | 1.987(2)   |
| C(16)-Ir(1)-O(1) | 176.30(8)  | O(3)-S(1)-C(17)   | 107.60(13) | S(1)-O(3)        | 1.439(2)   |
| C(16)-Ir(1)-O(2) | 90.31(8)   | O(4)-S(1)-O(3)    | 119.25(13) | S(1)-O(4)        | 1.4374(19) |
| C(16)-Ir(1)-N(1) | 80.41(9)   | O(4)-S(1)-C(14)   | 108.95(12) | S(1)-C(14)       | 1.767(2)   |
| C(16)-Ir(1)-N(2) | 95.48(9)   | O(4)-S(1)-C(17)   | 108.28(12) | S(1)-C(17)       | 1.767(3)   |
| C(17)-S(1)-C(14) | 103.26(12) | C(6)-N(1)-C(10)   | 118.9(2)   | O(1)-C(2)        | 1.268(3)   |
| C(2)-O(1)-Ir(1)  | 125.11(17) | C(10)-N(1)-Ir(1)  | 115.79(15) | O(2)-C(4)        | 1.274(3)   |
| C(4)-O(2)-Ir(1)  | 125.07(16) | C(31)-N(2)-Ir(1)  | 115.17(16) | N(1)-C(6)        | 1.351(3)   |
| C(6)-N(1)-Ir(1)  | 125.12(16) | C(35)-N(2)-Ir(1)  | 125.14(17) | C(29)-C(30)      | 1.356(3)   |

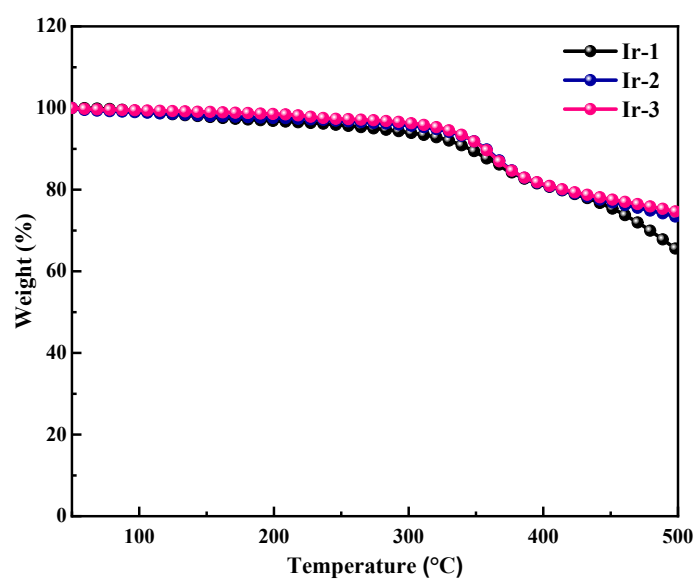**Fig. S3** TGA curves of these unsymmetric Ir<sup>III</sup>(ppy-vpy)acac-type complexes.

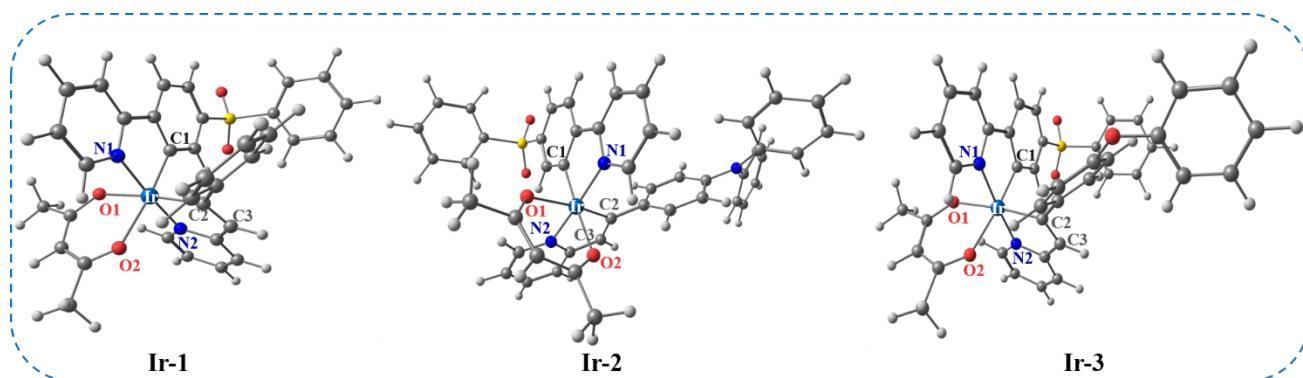

**Fig. S4** Optimized  $S_0$  geometries for **Ir-1**, **Ir-2** and **Ir-3**.

**Table S3** Optimized  $S_0$  geometries with key structural parameters for these Ir<sup>III</sup>(ppy-vpy)acac-type complexes.

|                        | <b>Ir-1</b> | <b>Ir-2</b> | <b>Ir-3</b> |
|------------------------|-------------|-------------|-------------|
| <b>Bond length (Å)</b> |             |             |             |
| Ir-O1                  | 2.194       | 2.194       | 2.194       |
| Ir-O2                  | 2.196       | 2.200       | 2.195       |
| Ir-N1                  | 2.071       | 2.073       | 2.067       |
| Ir-N2                  | 2.067       | 2.068       | 2.073       |
| Ir-C1                  | 2.005       | 2.006       | 2.006       |
| Ir-C2                  | 2.009       | 2.012       | 2.010       |
| C2-C3                  | 1.365       | 1.367       | 1.366       |
| <b>Bond angle (°)</b>  |             |             |             |
| N1-Ir-N2               | 176.110     | 175.917     | 176.037     |
| N1-Ir-C1               | 80.320      | 80.301      | 80.308      |
| N1-Ir-O1               | 86.822      | 86.813      | 86.621      |
| O1-Ir-O2               | 86.461      | 86.380      | 86.472      |
| O1-Ir-C2               | 173.738     | 173.844     | 173.700     |
| O2-Ir-N2               | 89.768      | 89.865      | 89.912      |
| O2-Ir-C1               | 173.868     | 174.142     | 173.970     |
| N2-Ir-C2               | 79.937      | 80.000      | 79.941      |
| C1-Ir-C2               | 91.800      | 90.805      | 91.323      |

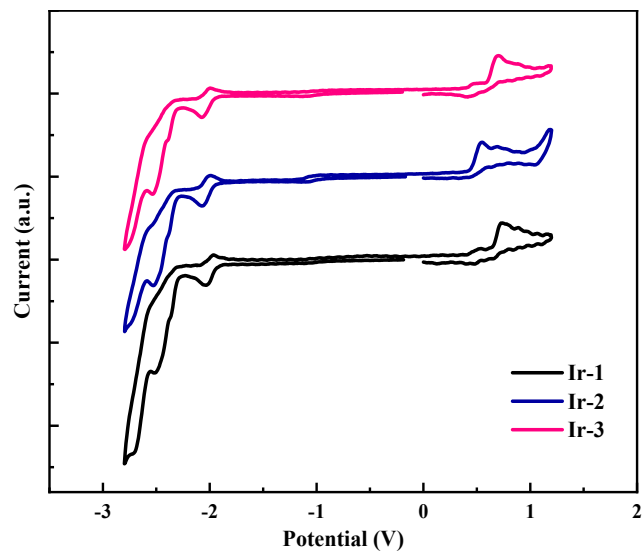

**Fig. S5** Cyclic curves of these unsymmetric Ir<sup>III</sup>(ppy-vpy)acac-type emitters are measured in degassed *N,N*-Dimethylformamide at room temperature.

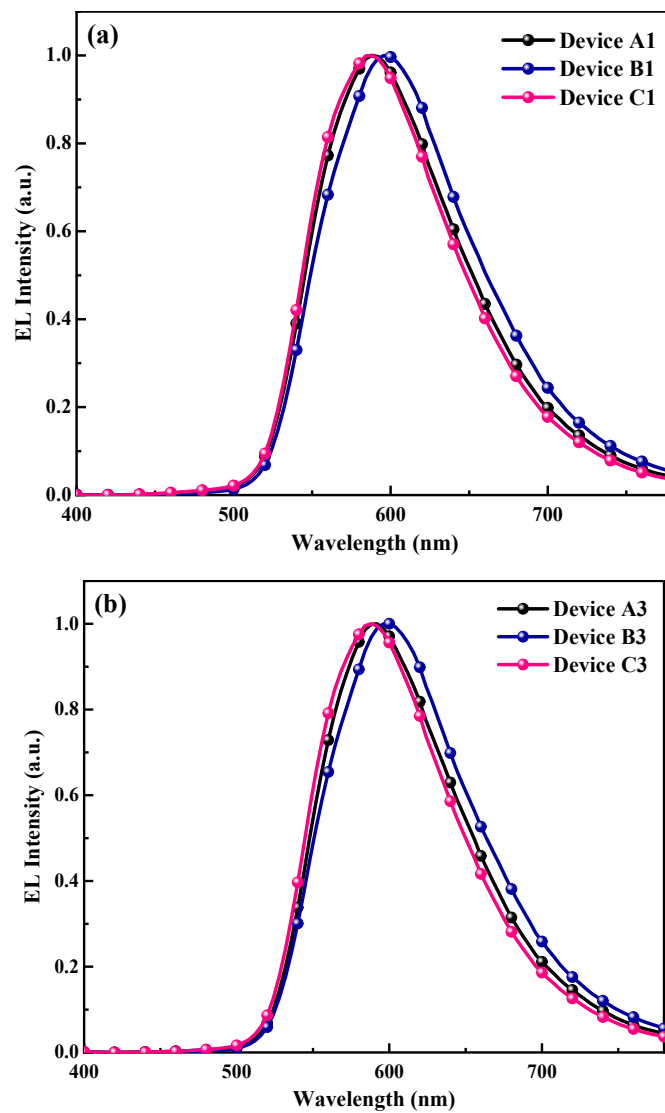

**Fig. S6** EL spectra for devices A1, A3, B1, B3, C1 and C3 at *ca.* 9 V.

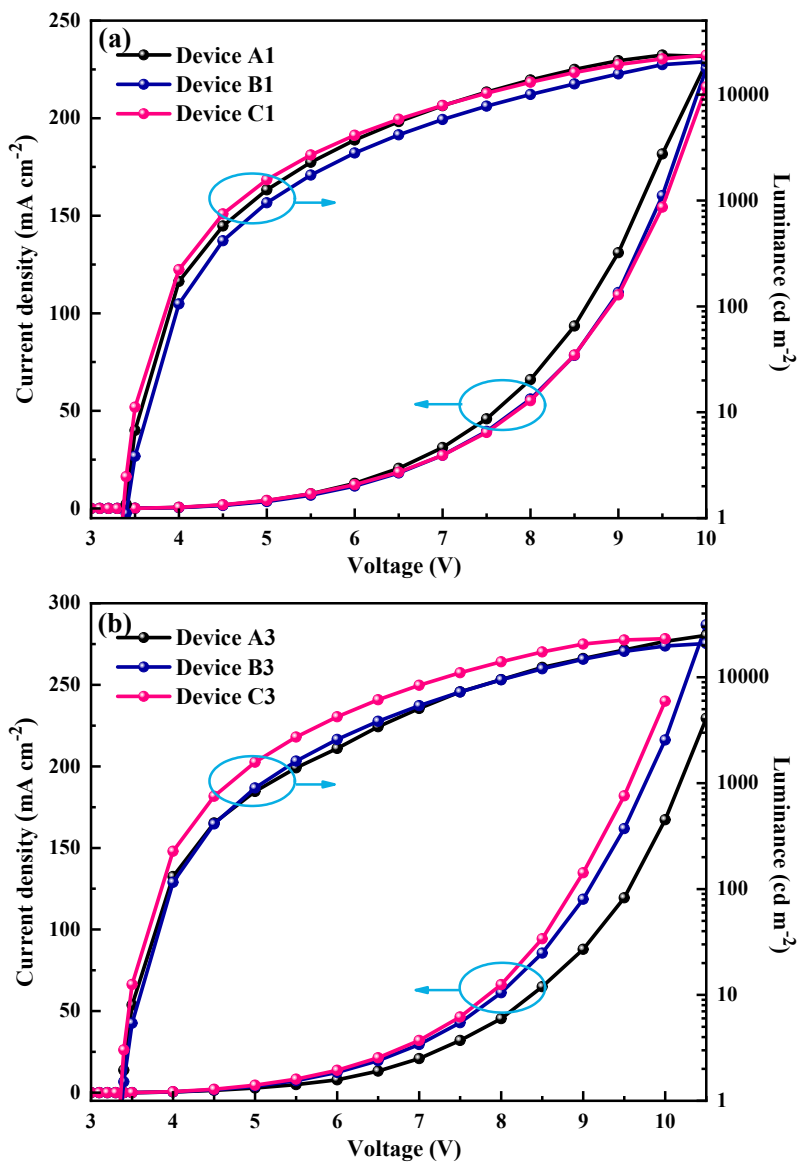

**Fig. S7** Current-density–voltage–luminance ( $J$ - $V$ - $L$ ) curves for devices of **A1**, **A3**, **B1**, **B3**, **C1** and **C3**.

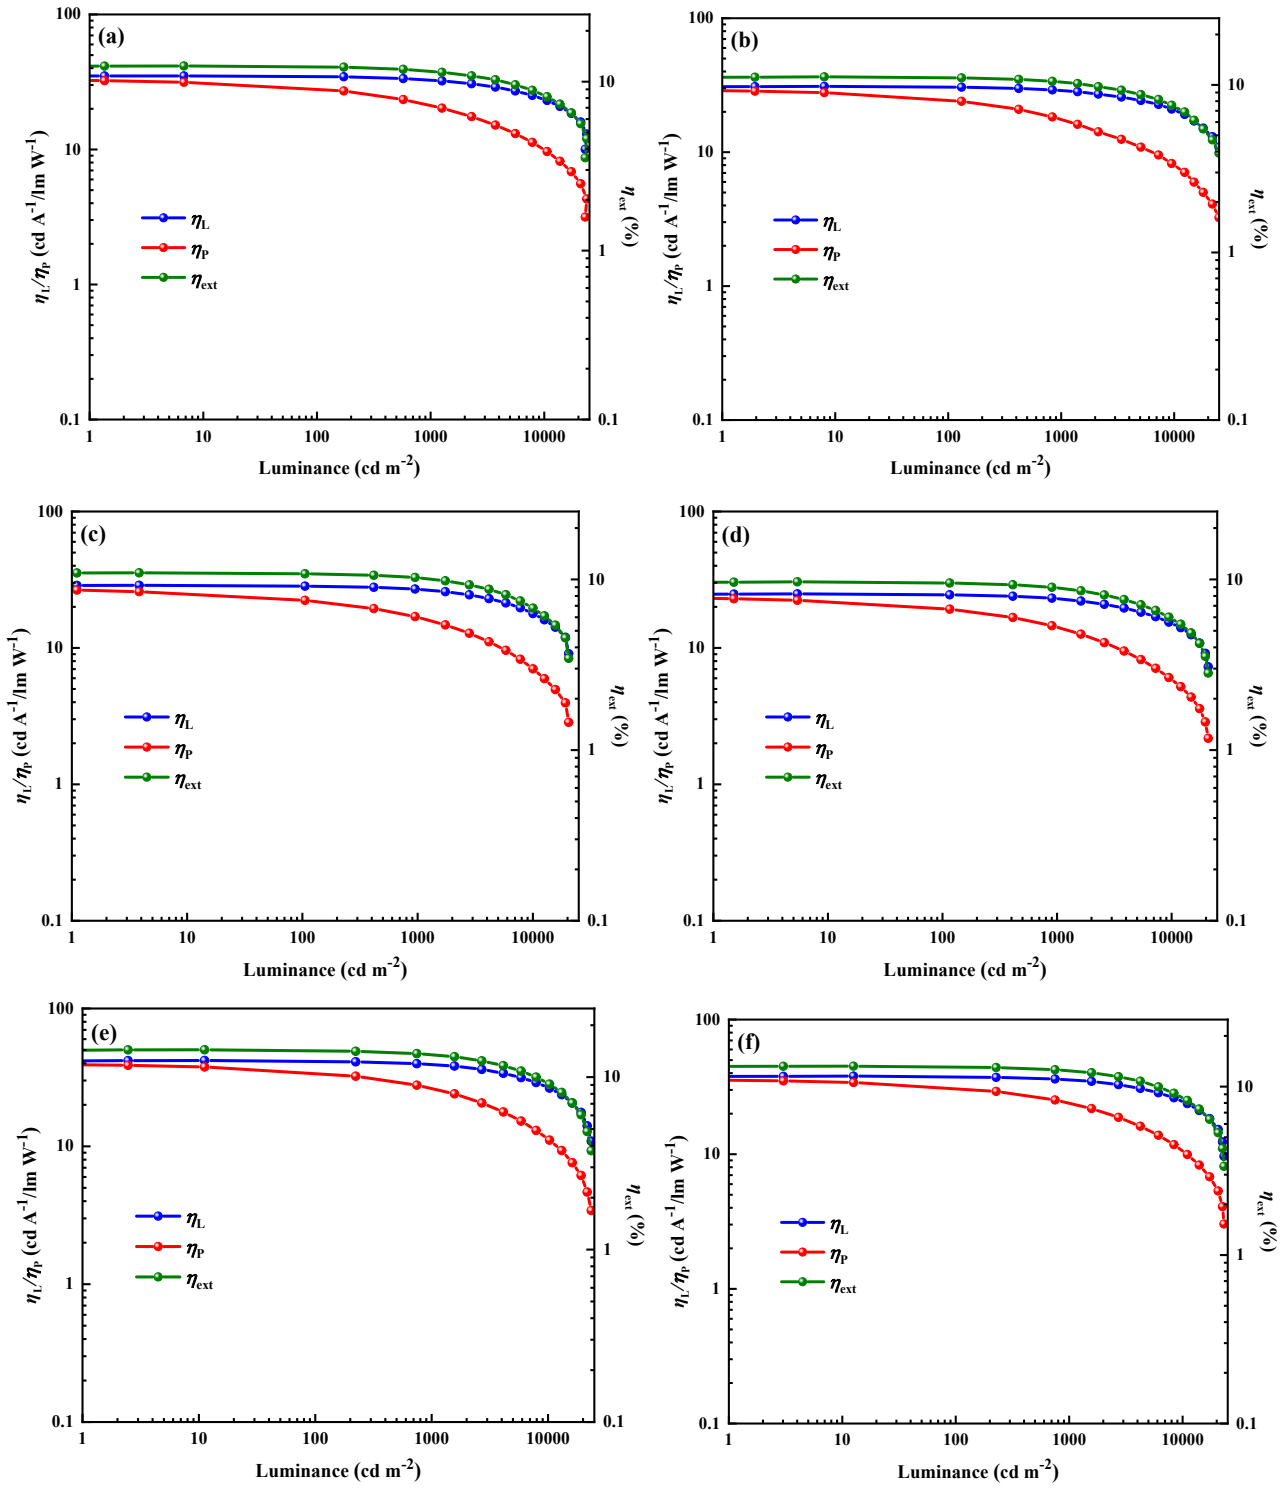

**Fig. S8** Relationship between EL efficiencies and luminance for the optimized devices. (a) Device **A1**, (b) Device **A3** (c) Device **B1** (d) Device **B3**, (e) Device **C1** and (f) Device **C3**.
